# Supplementary material
Source: ML conference proceedings conference paper supplement (https://openaccess.thecvf.com/content/CVPR2024/html/Hu_Animate_Anyone_Consistent_CVPR_2024_paper.html)
Supplement: Supplementary file 2 [file Hu_Animate_Anyone_Consistent_CVPR_2024_supplemental.zip]

Archive with 4 entries (4 files):
- animate_anyone_video.mp4
- __MACOSX/._animate_anyone_video.mp4
- animate_anyone_supp.pdf
- __MACOSX/._animate_anyone_supp.pdf
